# Supplementary material
Source: publisher figshare collection journal article supplement (https://plos.figshare.com/articles/dataset/_/145168)

## SUPPORTING ONLINE MATERIALS

### Supplemental Figures

**Supp. Fig. 1.** CBS protein levels in all mutants grown in the presence or absence of ethanol.

*Cys4Δ* cells (Wy35) were grown in SC+CYS media either in the absence or presence of 4% ethanol. After strains reached an  $OD_{600} \sim 1.5$ , extracts were prepared and Western analysis was performed using CBS antibody.

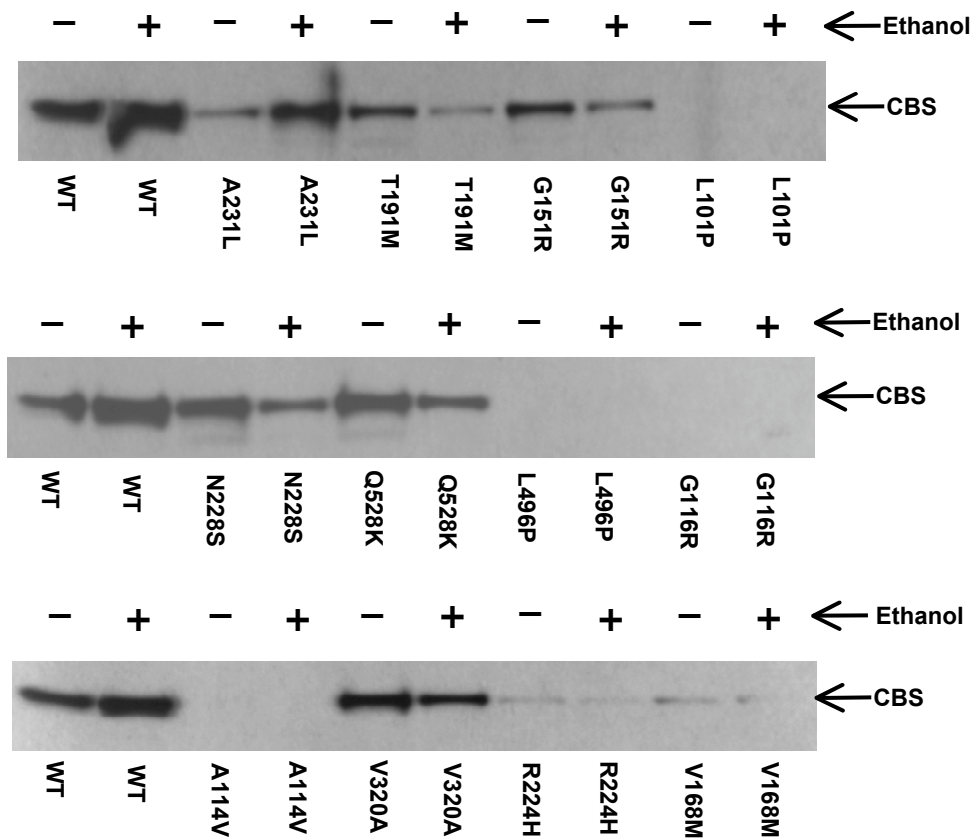

Supplement: Supplementary file 1 [file 1 › Figure_S1.pdf]
