# Supplementary material
Source: publisher figshare collection journal article supplement (https://plos.figshare.com/articles/dataset/_/145168)

**Supp. Fig. 2.** CBS protein levels in all mutants grown in the presence or absence of Hsp26. The indicated mutants were expressed in either a *cys4Δ* strain (Wy35) or a *cys4Δhsp26Δ* strain were grown in SC+CYS media, extracts were prepared, and Western analysis was performed using CBS antibody.

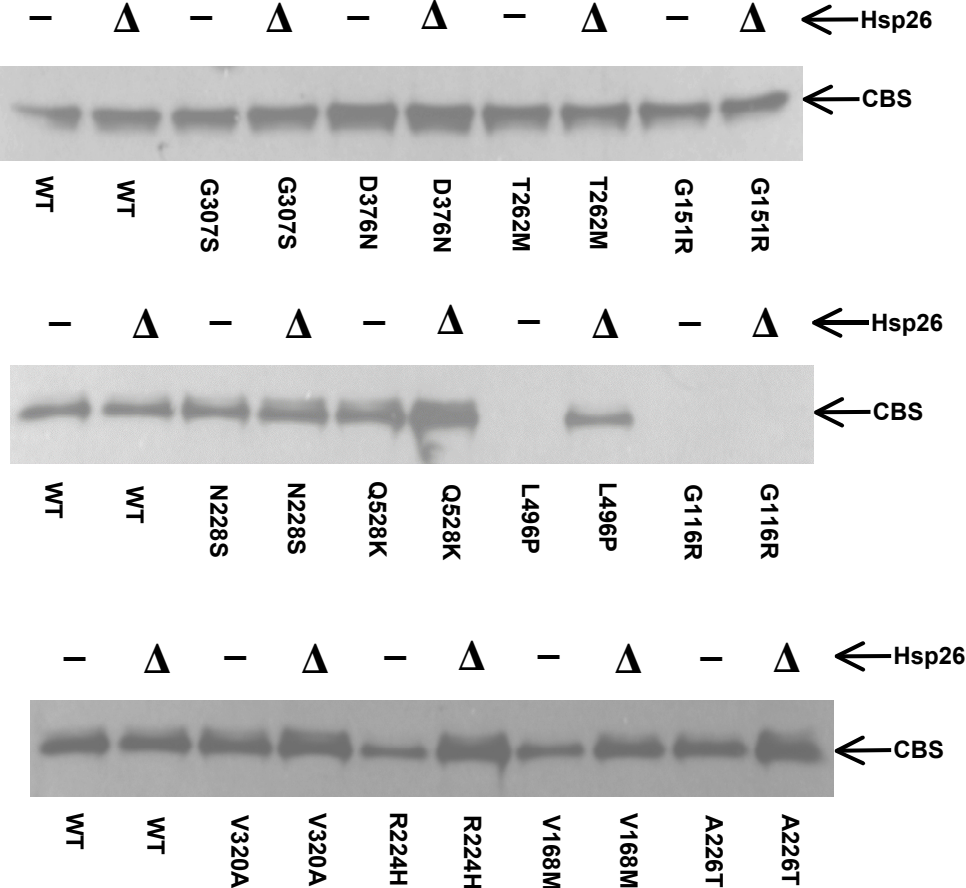

Supplement: Supplementary file 1 [file 1 › Figure_S2.pdf]
