# Supplementary material
Source: publisher figshare collection journal article supplement (https://plos.figshare.com/articles/dataset/_/145168)

**Supp. Fig. 3.** Interaction of D376N and G307S CBS with Hsp26. (A) The indicated mutants were expressed in either a *cys4Δ* strain (Wy35) or a *cys4Δhsp26Δ* (LS1) strain. Cells were grown in SC+CYS media, extracts were prepared, and Western analysis was performed using CBS, Hsp26, and  $\alpha$ -tubulin anti-bodies. The CBS enzyme activity present in each extract is shown at the bottom (n=3; standard deviation shown). (B) Lysates from cells expressing the indicated human CBS allele were prepared and subject to immunoprecipitation using Hsp26 directed anti-body. Immunocomplexes were then analyzed by Western blot with CBS anti-bodies. Lane labeled control is extract without IP.

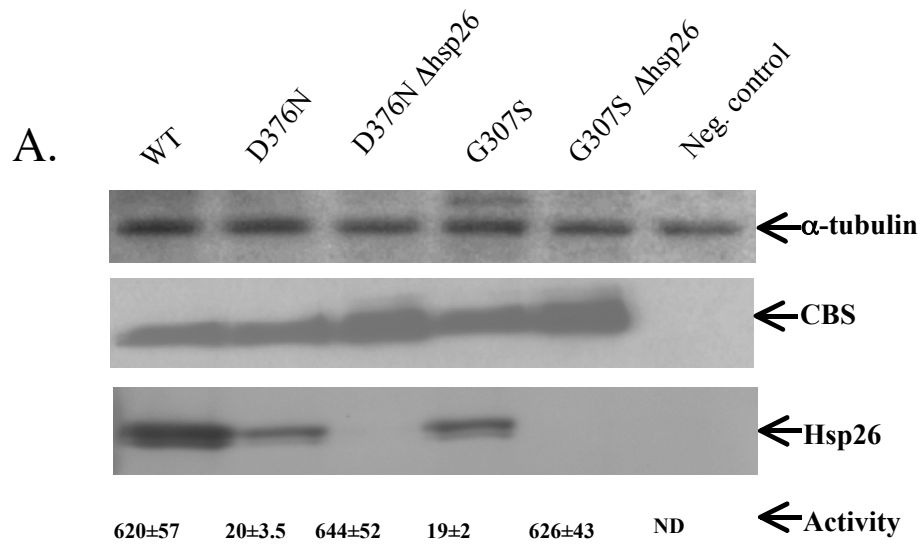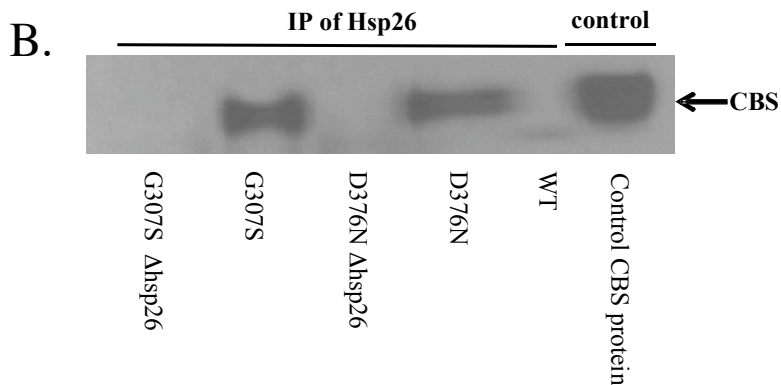

Supplement: Supplementary file 1 [file 1 › Figure_S3.pdf]
