# Supplementary material
Source: publisher figshare collection journal article supplement (https://plos.figshare.com/articles/dataset/_/145168)

**Supp. Fig. 4.** CBS protein levels in all mutants grown in the presence or absence of bortezomib. The indicated mutants were expressed in a *cys4Δ* strain (Wy35) grown in SC+CYS media in the presence or absence of 50  $\mu$ M bortezomib. After 24 hours, extracts were prepared and Western analysis was performed using CBS antibody.

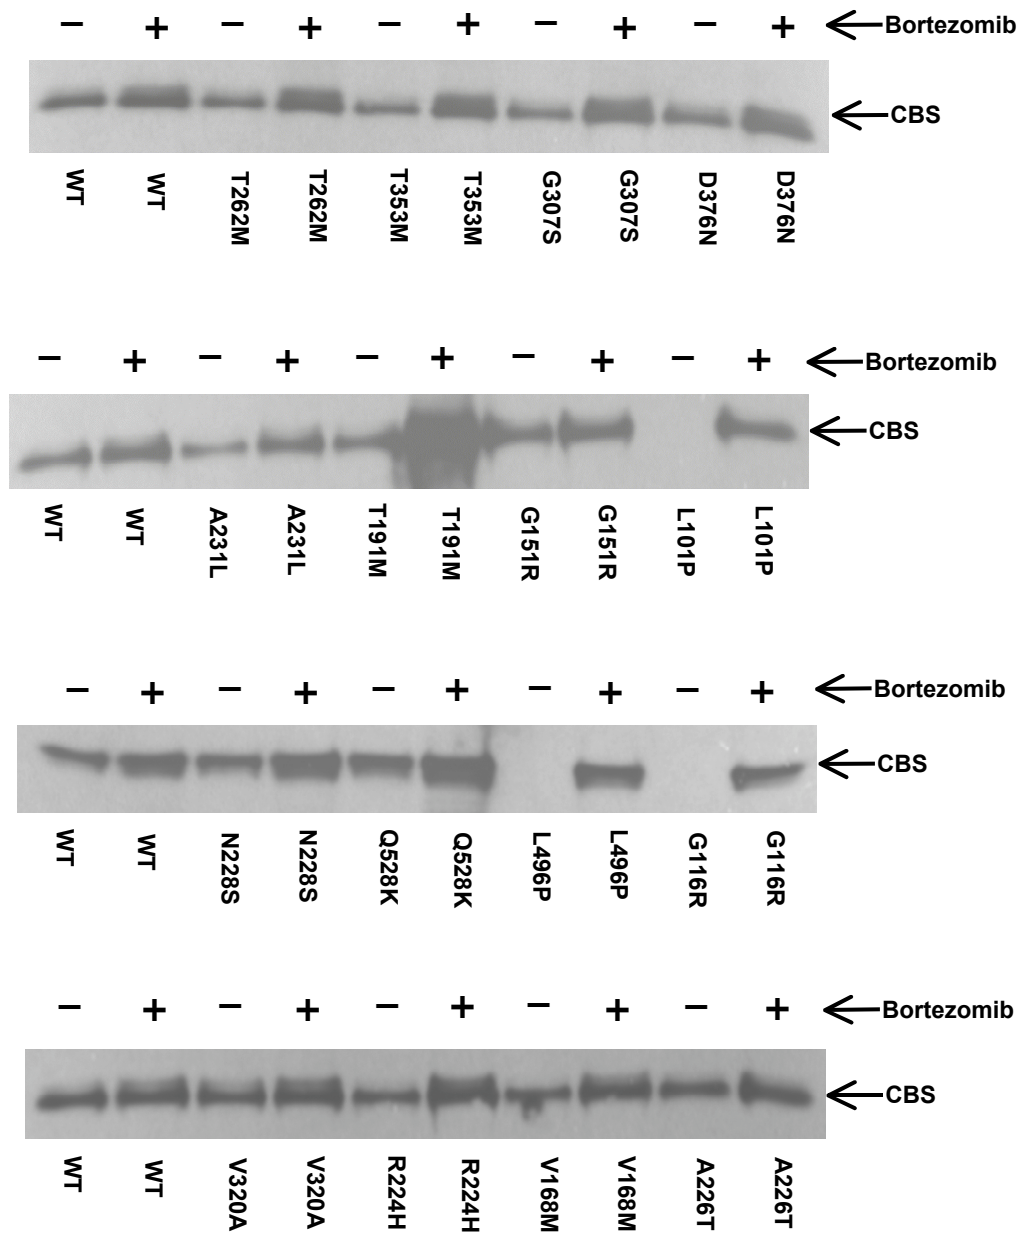

Supplement: Supplementary file 1 [file 1 › Figure_S4.pdf]
