# Supplementary material
Source: publisher figshare collection journal article supplement (https://plos.figshare.com/articles/dataset/_/145168)

**Supp. Fig. 5.** Effect of *ssa2Δ* and *hsp104Δ* on ethanol rescue of mutant p53. (A) *SSA2* or *ssa2Δ* yeast cells expressing the indicated p53 alleles were grown in either in the presence or absence of ethanol and assessed for growth in SC-ade-ura media after 24 hours by measuring OD<sub>600</sub>. (B) *HSP104* or *hsp104Δ* yeast cells expressing the indicated p53 alleles were grown in either in the presence or absence of ethanol and assessed for growth in SC-ade-ura media after 24 hours by measuring OD<sub>600</sub>.

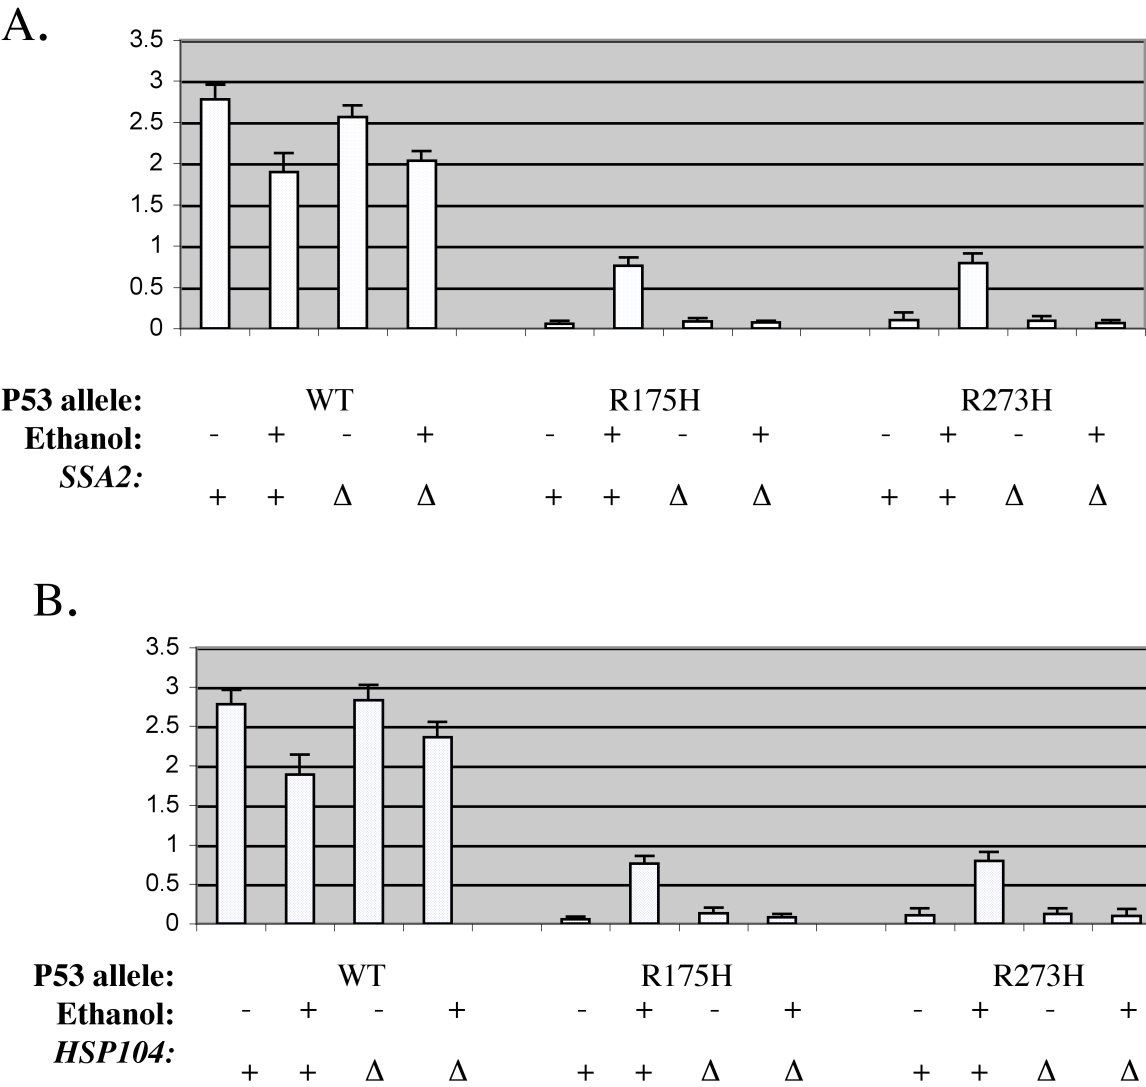

Supplement: Supplementary file 1 [file 1 › Figure_S5.pdf]
