# Supplementary material
Source: publisher figshare collection journal article supplement (https://plos.figshare.com/articles/dataset/_/145168)

**Supp. Fig. 6.** Rescue of multiple mutant p53 by ethanol or bortezomib treatment. Stationary phase culture of yeast yIG397 expressing the indicated human p53 allele was diluted 1:1000 in SC-ade -ura media supplemented with either 4% ethanol or 50  $\mu$ M bortezomib and grown at 30°C for 24 h. Growth was then determined by measuring OD at 600 nm.

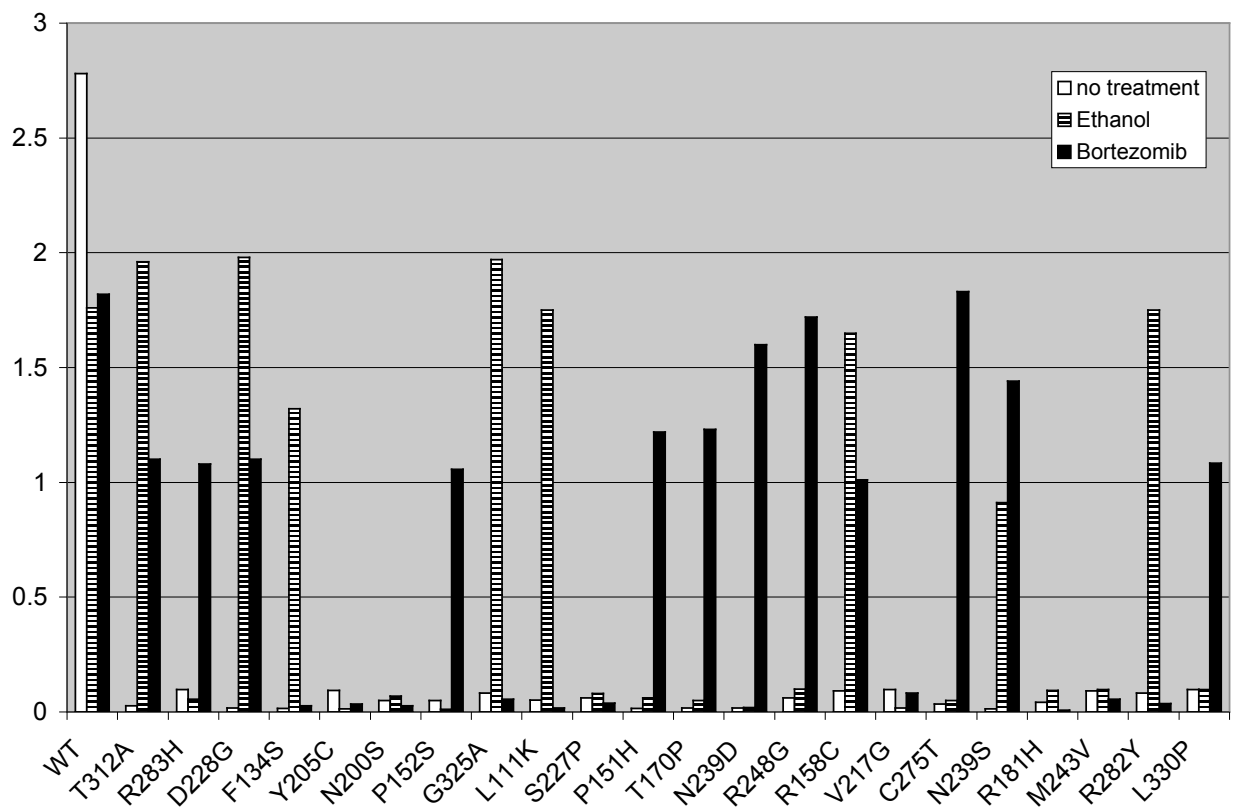

Supplement: Supplementary file 1 [file 1 › Figure_S6.pdf]
