# Supplementary material
Source: publisher figshare collection journal article supplement (https://plos.figshare.com/articles/dataset/_/145168)

**Supp. Fig. 8.** Serum total homocysteine and methionine levels in Tg-I278T Cbs<sup>-/-</sup> animals treated with bortezomib. Error bars show standard deviation \*P<0.05 (t-test, 2-sided).

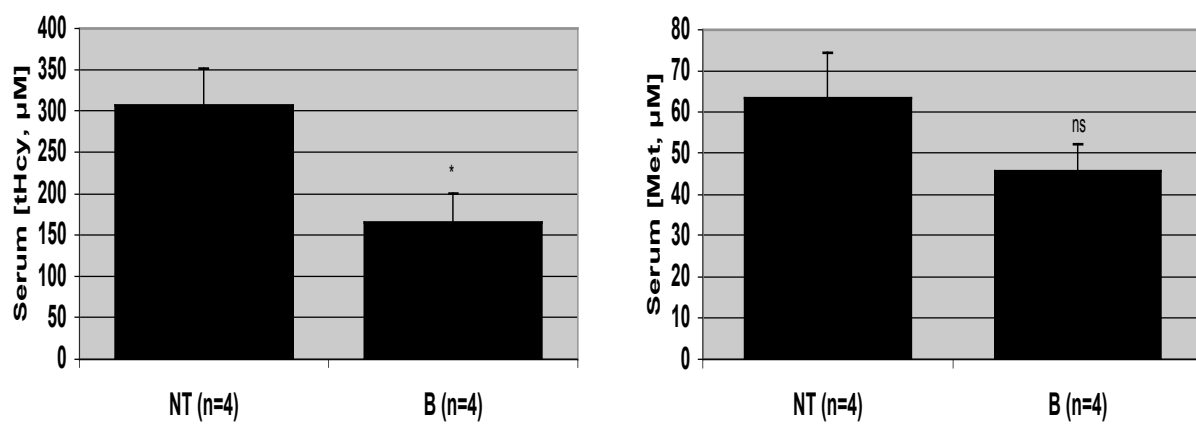

Supplement: Supplementary file 1 [file 1 › Figure_S8.pdf]
